# Supplementary material for: High-yield fabrication of suspended two-dimensional materials for atomic resolution imaging
Source: Royal Society of Chemistry journal article supplement (doi:10.1039/c6ra13344d), 2016-01-01
Supplement: c6ra13344d1.pdf [file c6ra13344d1.pdf]

## **Supplementary Information**

# **High-Yield Fabrication of Suspended Two-Dimensional Materials for Atomic Resolution Imaging**

**Jaehyun Han, Jun-Young Lee, Jeongun Choe, and Jong-Souk Yeo\***

School of Integrated Technology, Yonsei University, Songdo-dong, Yeonsu-gu, Incheon 406-840, Korea

Yonsei Institute of Convergence Technology, Yonsei University, Songdo-dong, Yeonsu-gu, Incheon 406-840, Korea

\*corresponding author: [jongsoukyeo@yonsei.ac.kr](mailto:jongsoukyeo@yonsei.ac.kr)

**Figure S1.**

**Optical and chemical characteristics of graphene and h-BN.**

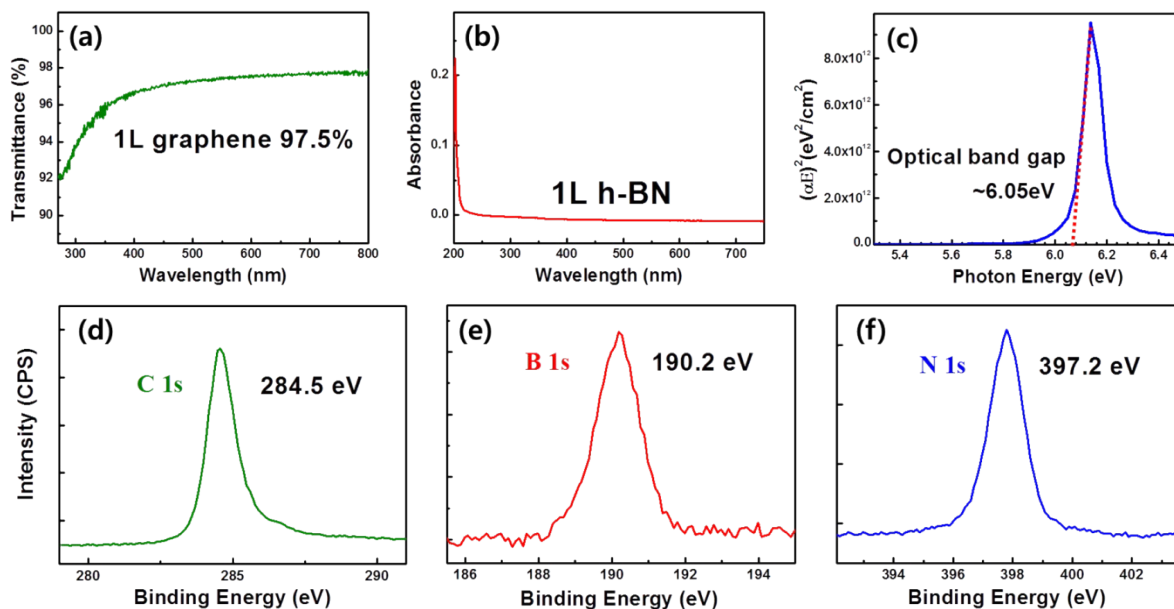

Transmittance of monolayer graphene (Figure S1a), and absorbance of monolayer h-BN (Figure S1b) were measured using UV-visible spectroscopy on a quartz tube. Optical band gap was calculated in the Figure S1c from the absorbance of h-BN. XPS spectra of (Figure S1d) C 1s, (Figure S1e) B 1s, and (Figure S1f) N 1s core level peaks were measured on graphene and h-BN.

**Figure S2.**

**Atomic resolution images of monolayer h-BN showing the merging process of different triangular holes.**

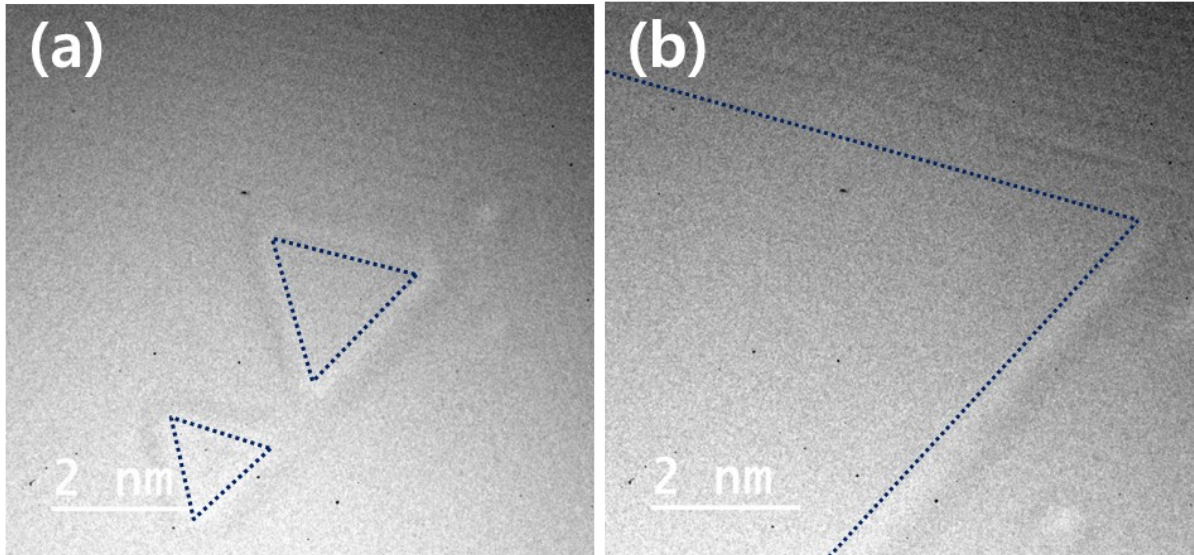

Two triangular holes similarly aligned in Figure S2a merged with each other to form a larger hole in Figure S2b while maintaining its own shape as a triangle during electron beam irradiation.

**Figure S3.**

**Atomic resolution images of a few layered h-BN and the process of triangular hole growth.**

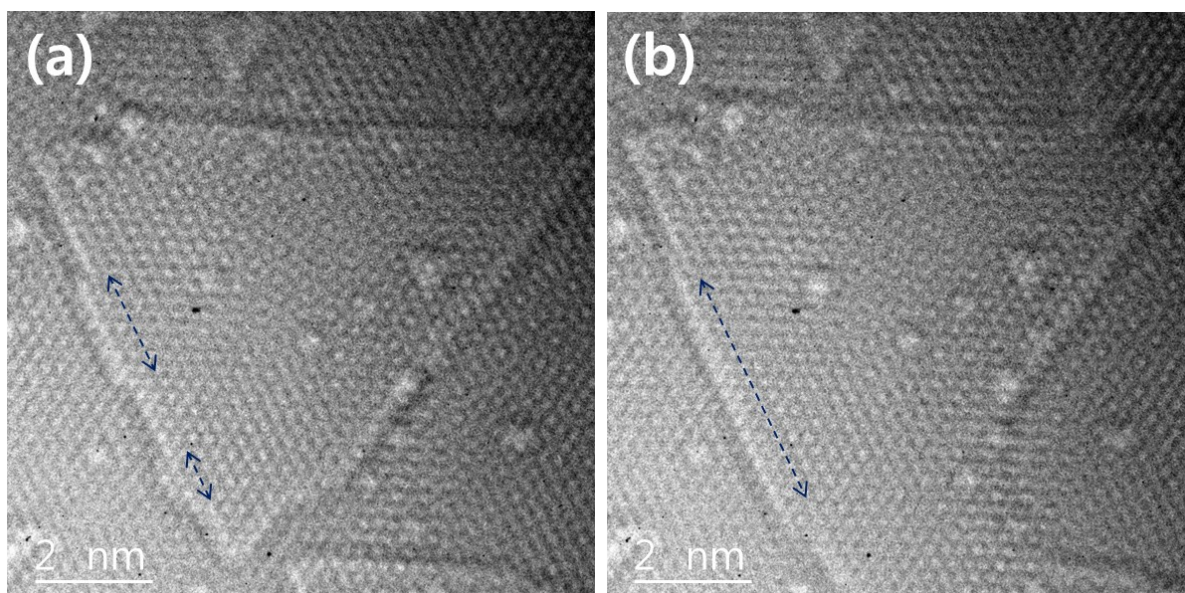

Irradiation using an electron beam forms small vacancies and triangular holes shown in Figure S3a. Due to the continuous irradiation using the electron beam, sputtering of atoms occurred at specific points along the triangular hole edges as indicated by the blue arrow in Figure S3a. The gradual expansion of the hole is shown in Figure S3b.
